# Supplementary material for: Defective internal allosteric network imparts dysfunctional ATP/substrate-binding cooperativity in oncogenic chimera of protein kinase A
Source: PubMed Central journal article supplement (PMC7946884; doi:10.1038/s42003-021-01819-6), 2021-03-10
Supplement: 42003_2021_1819_MOESM2_ESM.pdf [file 42003_2021_1819_MOESM2_ESM.pdf]

## Supplementary Information

### **Defective Internal Allosteric Network Imparts Dysfunctional ATP/Substrate Binding Cooperativity in Oncogenic Chimera of Protein Kinase A**

Cristina Olivieri<sup>1†</sup>, Caitlin Walker<sup>1†</sup>, Adak Karamafrooz<sup>1†</sup>, Yingjie Wang<sup>1,2,‡</sup>, Manu V.S.<sup>1</sup>,  
Fernando Porcelli<sup>3</sup>, Donald K. Blumenthal<sup>4</sup>, David D. Thomas<sup>1</sup>, David A. Bernlohr<sup>1</sup>, Simon M.  
Sandford<sup>5</sup>, Susan S. Taylor<sup>6,7</sup>, and Gianluigi Veglia<sup>1,2\*</sup>

<sup>1</sup>Department of Biochemistry, Molecular Biology, and Biophysics and <sup>2</sup>Chemistry, University of Minnesota, Minneapolis, MN 55455, USA

<sup>3</sup>DIBAF - University of Tuscia – Largo dell' Università, 01100 Viterbo, Italy

<sup>4</sup>Department of Pharmacology and Toxicology, University of Utah, Salt Lake City, UT 84112, USA

<sup>5</sup>Laboratory of Cellular Biophysics, Rockefeller University, New York, NY 10065, USA

<sup>6</sup>Department of Chemistry and Biochemistry and Pharmacology, University of California at San Diego, La Jolla, CA 92093, USA

<sup>†</sup>These authors contributed equally

<sup>‡</sup> Present address: Shenzhen Bay Laboratory, Shenzhen 518055, China

\*Corresponding Author:

Gianluigi Veglia  
Department of Chemistry and Department of Biochemistry,  
Molecular Biology, and Biophysics,  
312 Church St. SE, Minneapolis, MN 55455  
Telephone: (612) 625-0758  
Fax: (612) 625-5780  
E-mail: [vegli001@umn.edu](mailto:vegli001@umn.edu).

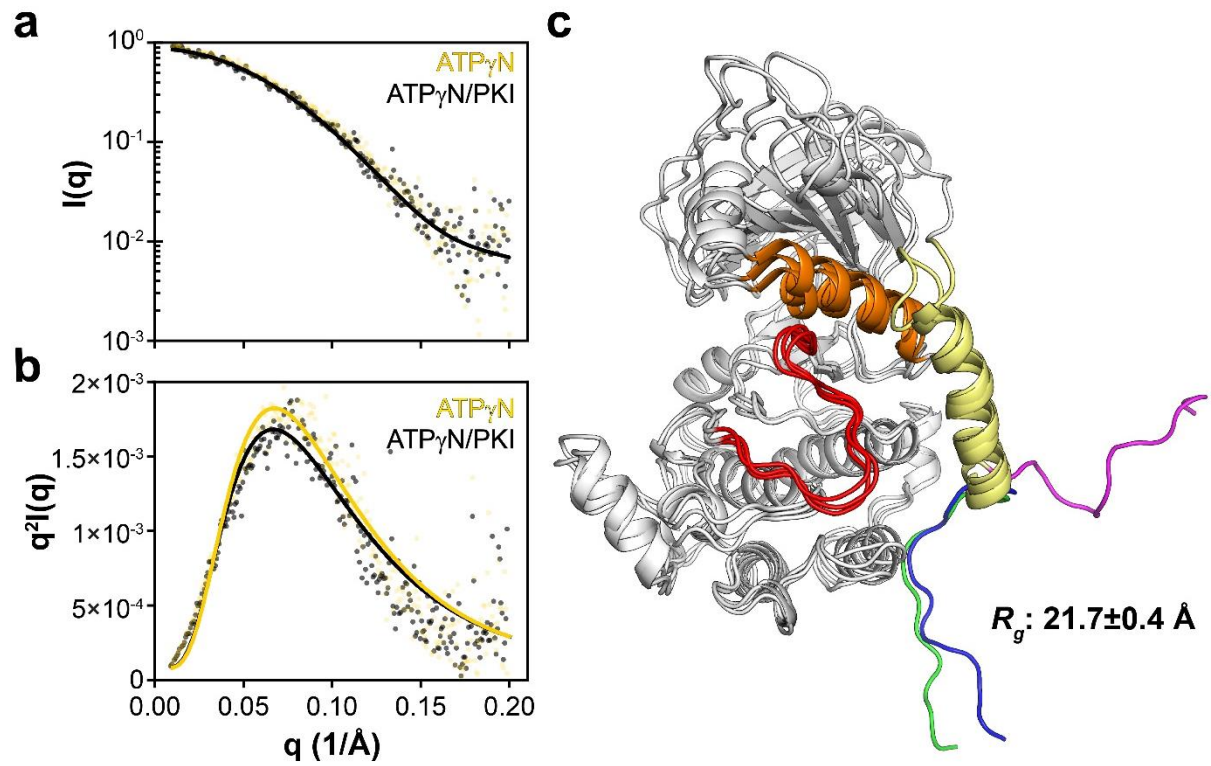

**Supplementary Fig. 1:** SAXS profiles for PKA-C<sup>WT</sup>. **a** SAXS profiles of PKA-C<sup>WT</sup> in the binary (ATP<sub>γ</sub>N-bound, yellow) and ternary (ATP<sub>γ</sub>N/PKI-bound, black) forms. Continuous lines show the fitting of the experimental SAXS data. **b** Corresponding Kratky plot of PKA-C<sup>WT</sup> bound to ATP<sub>γ</sub>N and ATP<sub>γ</sub>N/PKI. **c** Overlay of selected snapshots of PKA-C<sup>WT</sup>.

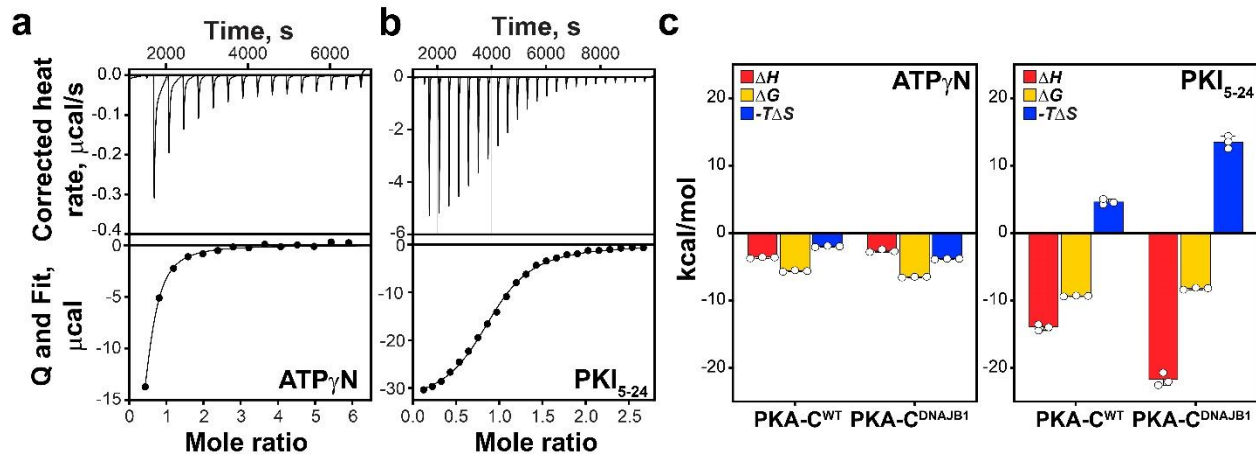

**Supplementary Fig. 2:** Thermodynamics of PKA-C<sup>DNAJB1</sup> binding nucleotide and pseudo-substrate. Representative ITC thermographs of apo PKA-C<sup>DNAJB1</sup> binding **a** ATP<sub>γ</sub>N, and **b** PKI<sub>5-24</sub>. Corresponding thermodynamic values are found in Supplementary Table 1, 2. **c** Graphical representation of the values of  $\Delta H$  (red),  $\Delta G$  (yellow), and  $-T\Delta S$  (blue). Errors are calculated as SD from triplicate measurements.

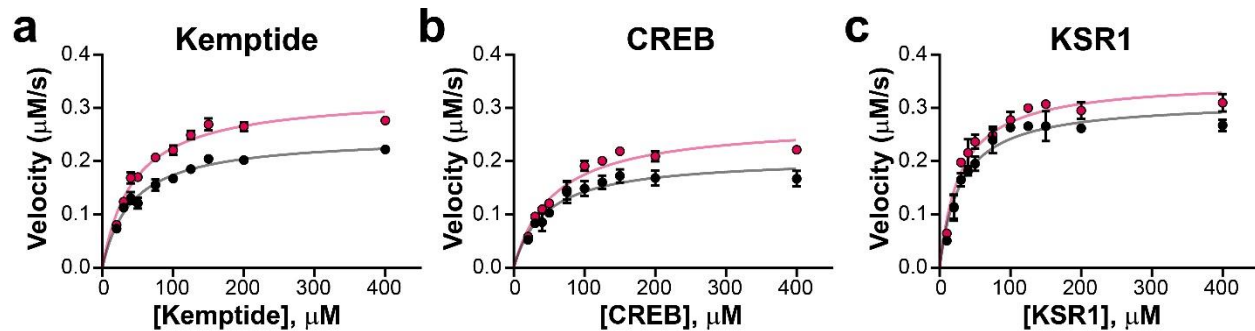

**Supplementary Fig. 3:** Steady state kinetics of phosphoryl transfer. Steady state phosphorylation kinetics of PKA-C<sup>WT</sup> (black) and PKA-C<sup>DNAJB1</sup> (pink) towards **a** Kemptide, **b** CREB, and **c** KSR1. See Supplementary Table 3 for corresponding kinetic parameters following fitting with the Michaelis-Menten equation.

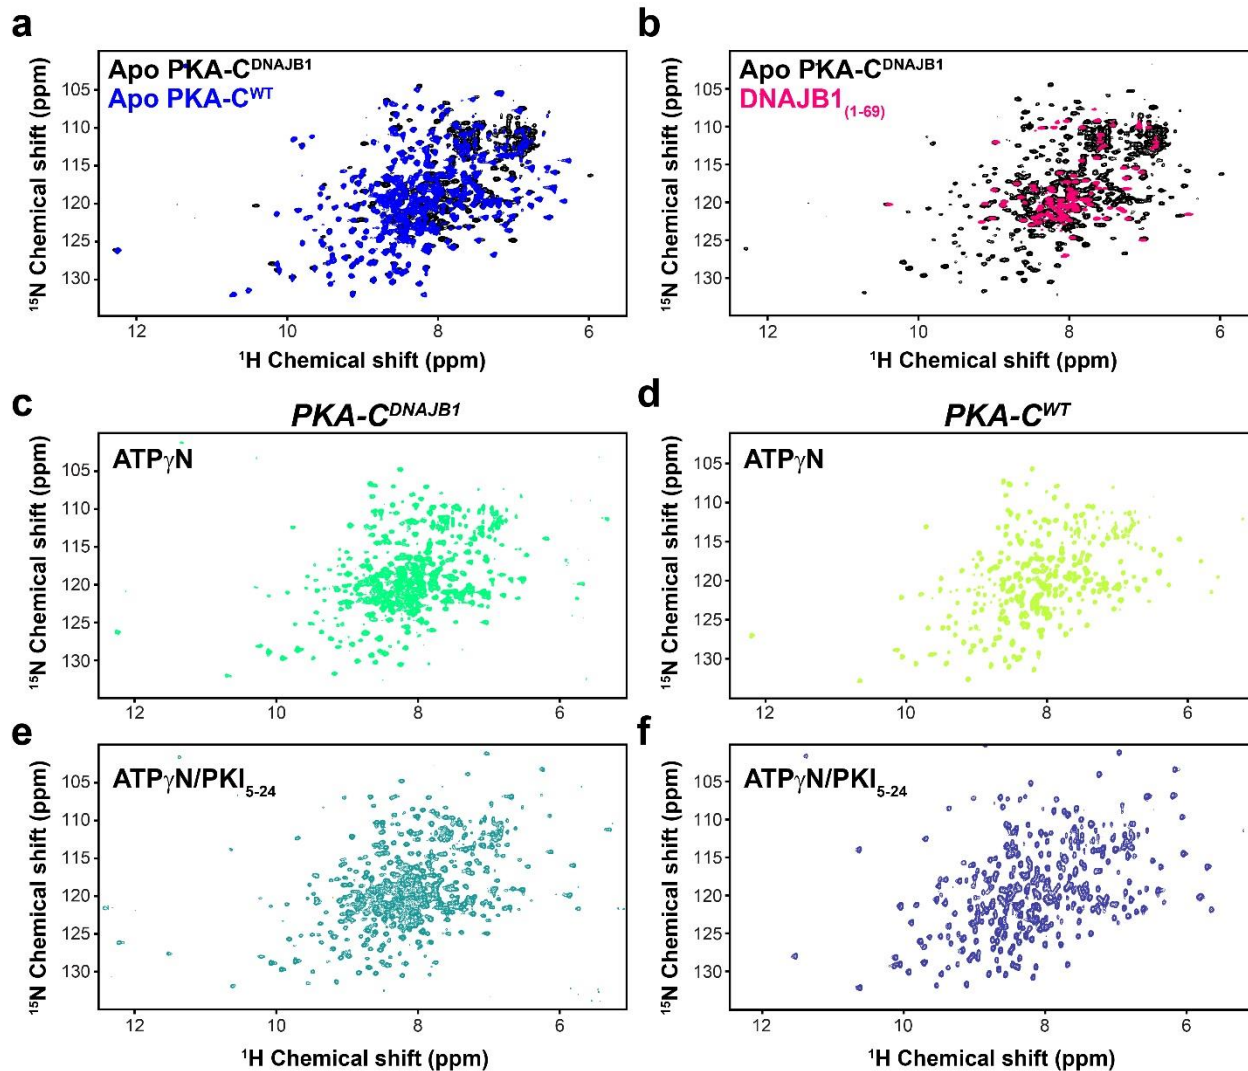

**Supplementary Fig. 4:** NMR amide fingerprints of PKA-C<sup>DNAJB1</sup> and PKA-C<sup>WT</sup>. [ $^1\text{H}$ ,  $^{15}\text{N}$ ]-TROSY-HSQC spectrum overlay of apo PKA-C<sup>DNAJB1</sup> to **a** apo PKA-C<sup>WT</sup> and **b** DNAJB1<sup>(1-69)</sup>. [ $^1\text{H}$ ,  $^{15}\text{N}$ ]-TROSY-HSQC spectrum of PKA-C<sup>DNAJB1</sup> bound to **c** ATP $\gamma$ N and **e** ATP $\gamma$ N/PKI<sub>5-24</sub>, and of PKA-C<sup>WT</sup> bound to **d** ATP $\gamma$ N and **f** ATP $\gamma$ N/PKI<sub>5-24</sub>.

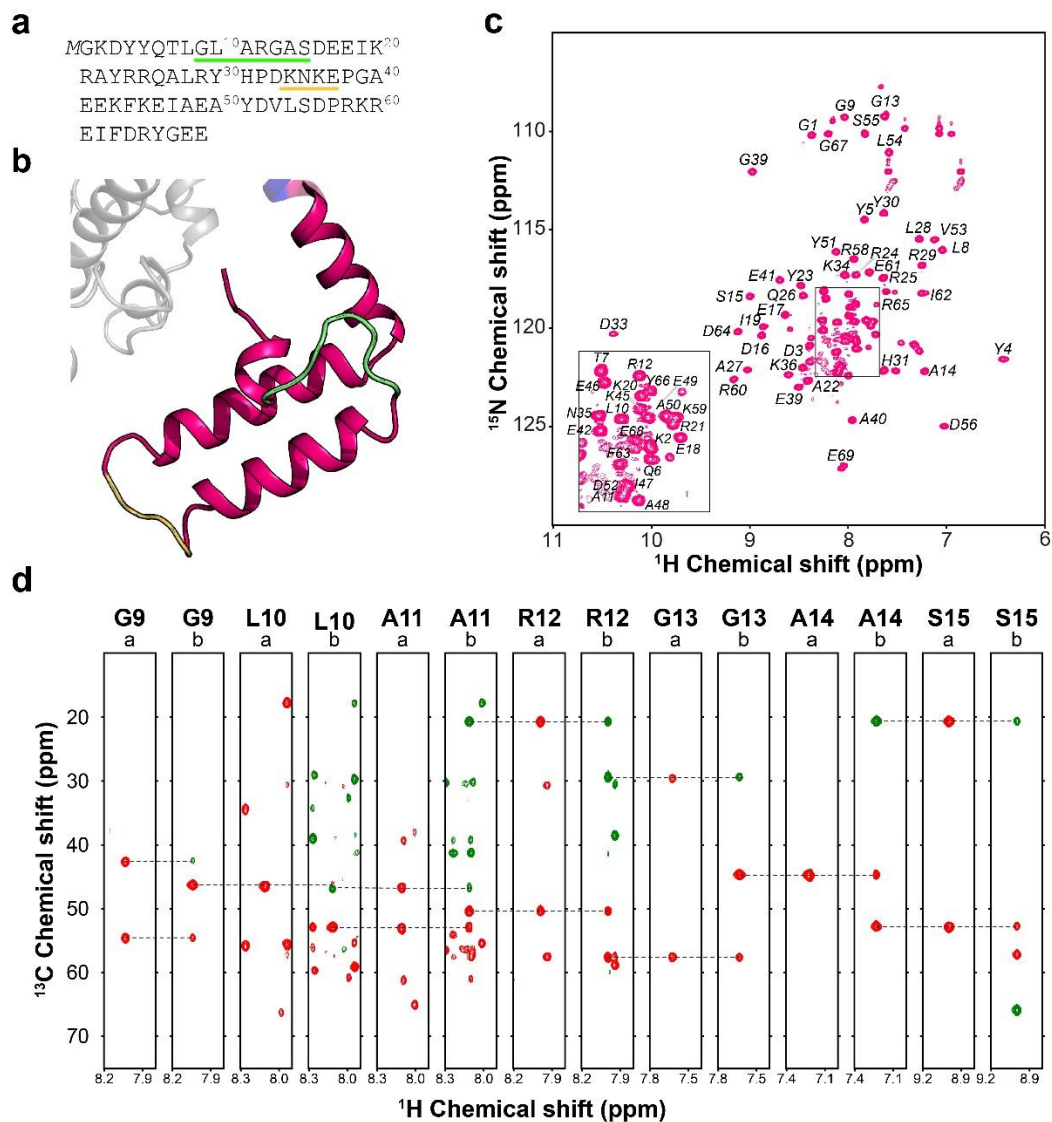

**Supplementary Fig. 5:** NMR backbone assignment of DNAJB1<sub>1-69</sub>. **a** Primary sequence of DNAJB1 (Uniprot 25685). The sequence underlined in green are the residues which through-bound connectivity is reported in panel D. Residues that could not be assigned are underlined in yellow. **b** The three-dimensional structure of the J-domain (DNAJB1) of PKA-C<sup>DNAJB1</sup> (PDB 4WB7). **c** [<sup>1</sup>H,<sup>15</sup>N]-Heteronuclear single quantum correlation (HSQC) spectrum of DNAJB1<sub>1-69</sub> with resonance assignment. **d** Series of strip plots from the CBCA(CO)HN (a) and HNCACB (b) experiments that illustrates the sequential connections between residue G9 and S15.

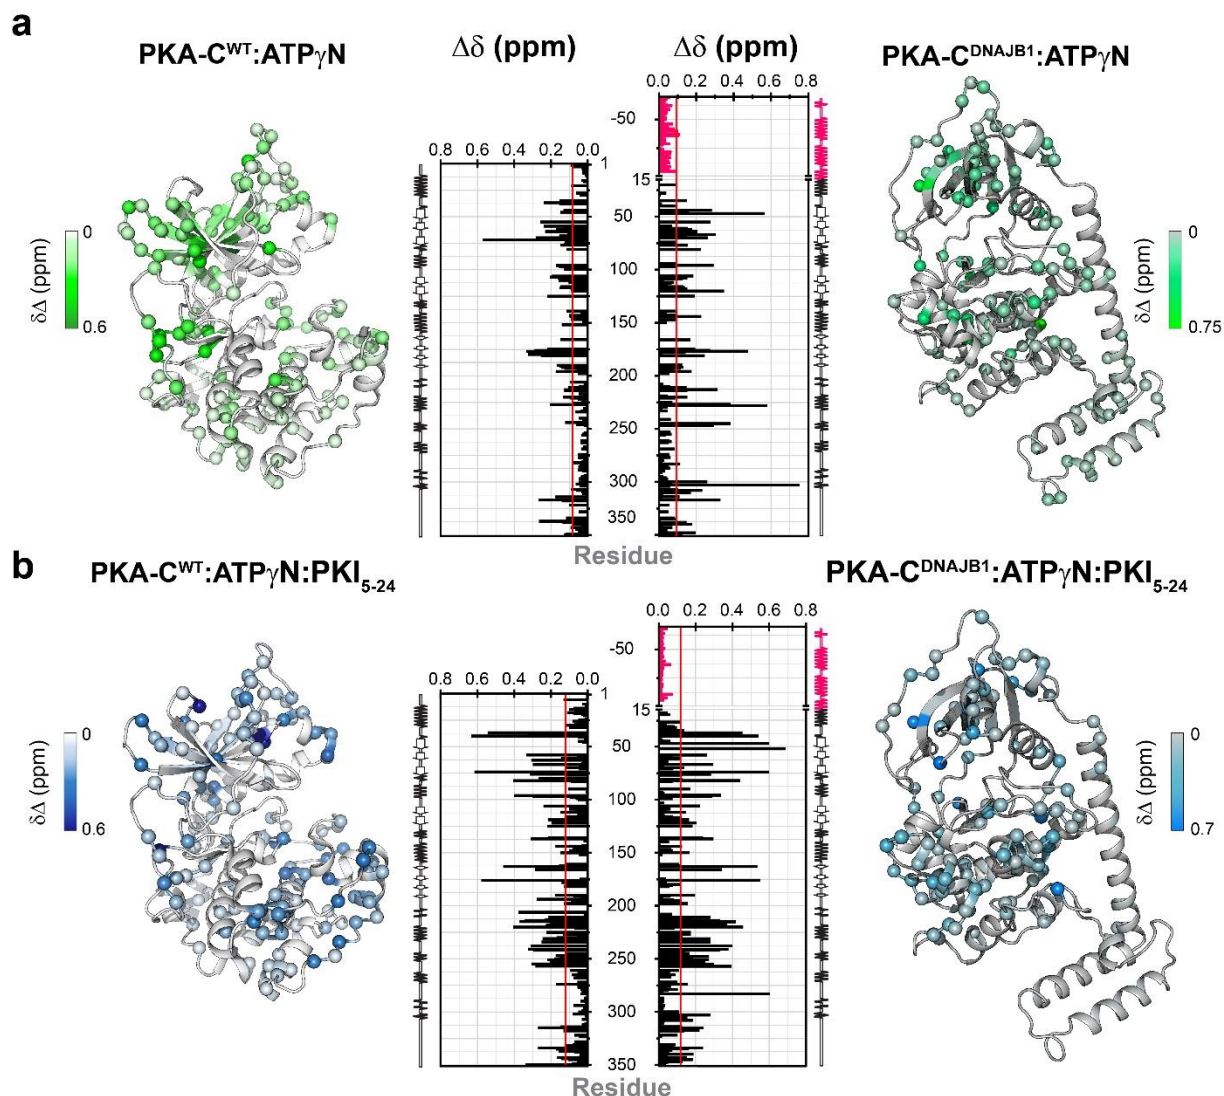

**Supplementary Fig. 6:** Chemical shift perturbations (CSP) observed upon ligand binding for PKA-C<sup>WT</sup> and PKA-C<sup>DNAJB1</sup>. Histograms show the combined <sup>1</sup>H-<sup>15</sup>N chemical shift perturbations vs. residue for PKA-C<sup>WT</sup> and PKA-C<sup>DNAJB1</sup> in response to **a** ATP<sub>γ</sub>N-binding and **b** ATP<sub>γ</sub>N/PKI<sub>5-24</sub>-binding. Each CSP is plotted on the structures of either PKA-C<sup>WT</sup> (PDB: 4WB5) or PKA-C<sup>DNAJB1</sup> (PDB: 4WB7). The red line on the histograms indicate one standard deviation from the average CSP. Note that the CSP values for PKA-C<sup>WT</sup> are from <sup>1</sup>.

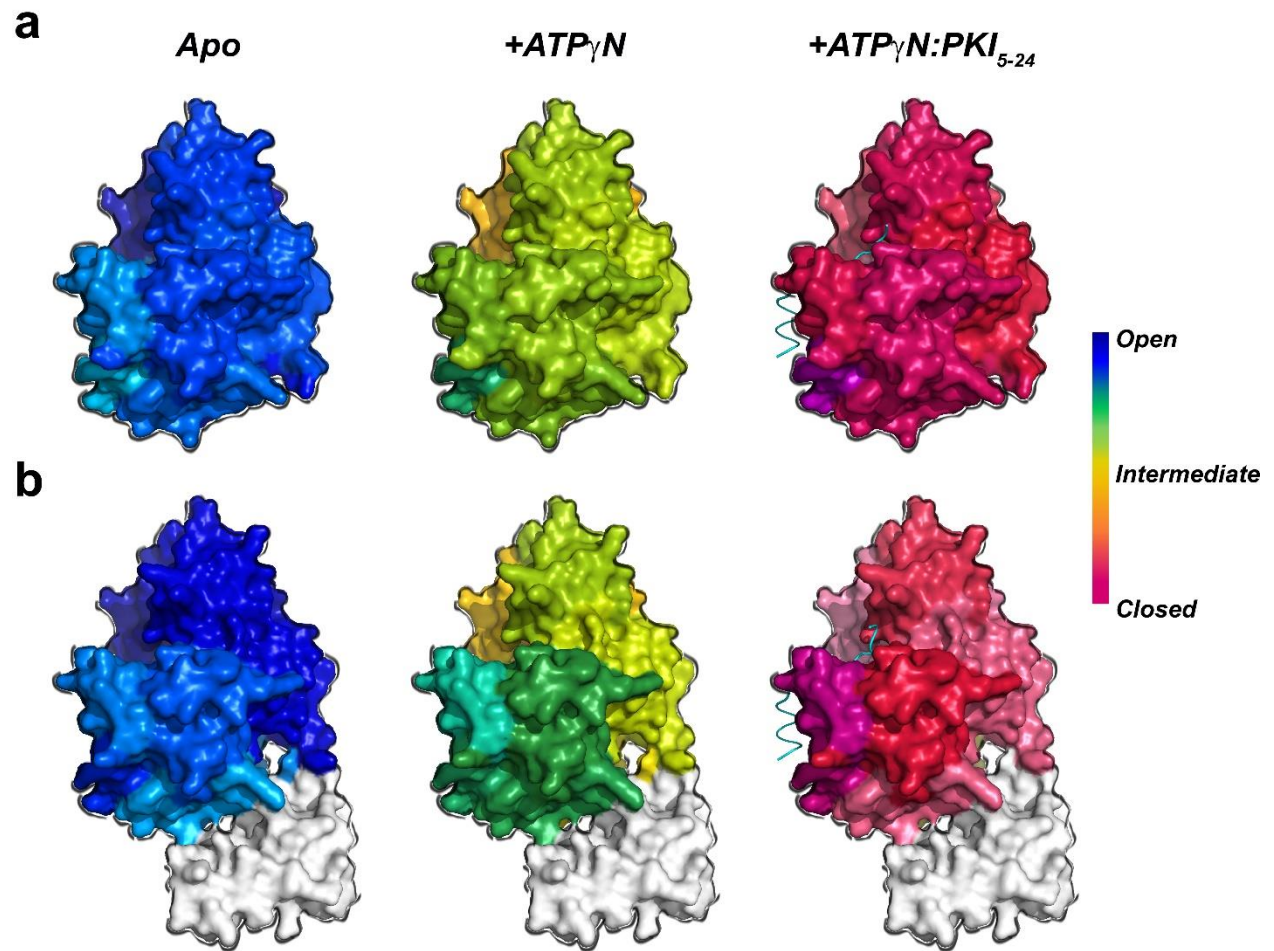

**Supplementary Fig. 7:** CONCISE scores of each individual community mapped onto the surface of **a** PKA-C<sup>WT</sup> and **b** PKA-C<sup>DNAJB1</sup>.



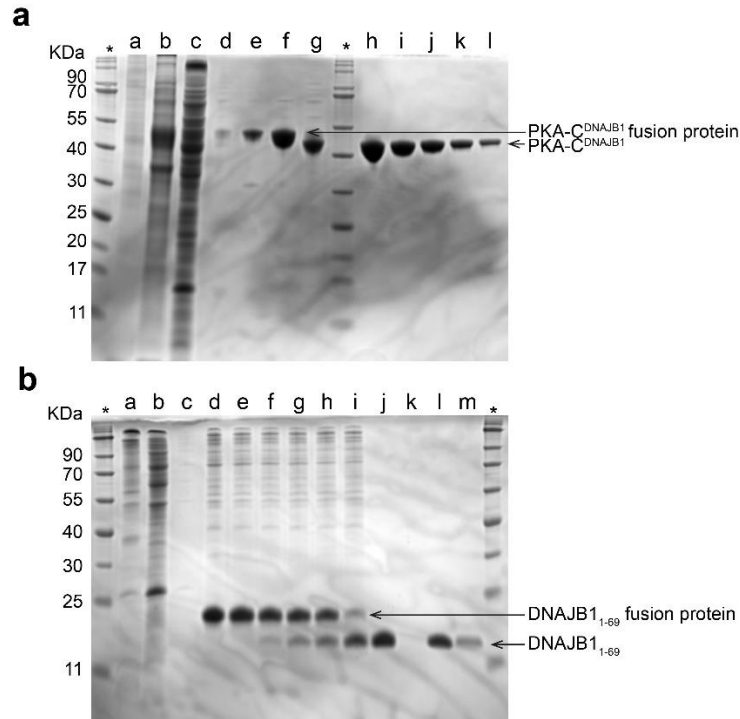

**Supplementary Fig. 8:** Isolation and purification of PKA-C<sup>DNAJB1</sup> and DNAJB1<sub>1-69</sub>. **a** Coomassie-stained 12% Acrylamide/bis-acrylamide SDS-PAGE of the expression and purification (a-g), and protein integrity test (i-k) of U-<sup>15</sup>N PKA-C<sup>DNAJB1</sup>. (\*) BLUEstain™ Protein ladder (GoldBio), 11-245 kDa; (a) before induction of expression with 0.4 mM of IPTG; (b) after 12 hour expression; (c) Ni<sup>+</sup>-NTA flow through; (d) wash 1; (e) wash 2; (f) elution; (g) after 18 hours of cleavage; (h) 15 μM of U-<sup>15</sup>N PKA-C<sup>DNAJB1</sup> used for the NMR titration; (i-l) serial dilutions of sample *h*. **b** Coomassie-stained 18% Acrylamide/bis-acrylamide SDS-PAGE of the purification of U-<sup>13</sup>C/<sup>15</sup>N DNAJB1<sub>1-69</sub>. (\*) BLUEstain™ Protein ladder (GoldBio), 11-245 kDa; (a) cell pellet; (b) Ni<sup>+</sup>-NTA flow through; (c) wash; (d) elution; (e) before thrombin cleavage; (f) 1 hour into cleavage reaction; (g) 2 hours into cleavage reaction; (h) 3 hours into cleavage reaction; (i) 4 hours into cleavage reaction; (j) flow through from 10 kDa concentrator; (k) flow through from 3 kDa concentrator; (l) supernatant of 3 kDa concentrator; (m) NMR sample.

**Supplementary Table 1:** Changes in enthalpy, entropy, free energy, and dissociation constant of binding ATP $\gamma$ N for PKA-C<sup>WT</sup> and PKA-C<sup>DNAJB1</sup> derived from ITC experiments. All errors were calculated using triplicate measurements. Note that the values of K<sub>d</sub> for PKA-C<sup>WT</sup> are taken from Walker *et al.* <sup>1</sup>.

|                         | K <sub>d</sub> (μM) | ΔG (kcal/mol) | ΔH (kcal/mol) | -TΔS (kcal/mol) |
|-------------------------|---------------------|---------------|---------------|-----------------|
| PKA-C <sup>WT</sup>     | 83 ± 8              | -5.61 ± 0.06  | -3.6 ± 0.1    | - 2.0 ± 0.1     |
| PKA-C <sup>DNAJB1</sup> | 19 ± 4              | -6.5 ± 0.1    | -2.7 ± 0.2    | -3.8 ± 0.1      |

**Supplementary Table 2:** Changes in enthalpy, entropy, free energy, and dissociation constant for the binding of PKI<sub>5-24</sub> to the apo and nucleotide-saturated forms of PKA-C<sup>WT</sup> and PKA-C<sup>DNAJB1</sup> derived from ITC experiments. All errors were calculated using triplicate measurements. Errors in σ were propagated from errors in K<sub>d</sub>. N/A indicates the value is not applicable to the particular measurements. Note that the values of K<sub>d</sub> for PKA-C<sup>WT</sup> are taken from Walker *et al.* <sup>1</sup>.

| Binding of PKI <sub>5-24</sub> to apo forms of kinases                          |                     |               |               |                 |          |
|---------------------------------------------------------------------------------|---------------------|---------------|---------------|-----------------|----------|
|                                                                                 | K <sub>d</sub> (μM) | ΔG (kcal/mol) | ΔH (kcal/mol) | -TΔS (kcal/mol) | σ        |
| PKA-C <sup>WT</sup>                                                             | 17 ± 2              | -6.6 ± 0.1    | -10.8 ± 0.5   | 4.2 ± 0.5       | N/A      |
| PKA-C <sup>DNAJB1</sup>                                                         | 9 ± 2               | -6.9 ± 0.1    | -20.1 ± 0.4   | 13.1 ± 0.4      | N/A      |
| Binding of PKI <sub>5-24</sub> to the ATP $\gamma$ N saturated forms of kinases |                     |               |               |                 |          |
|                                                                                 | K <sub>d</sub> (μM) | ΔG (kcal/mol) | ΔH (kcal/mol) | -TΔS (kcal/mol) | σ        |
| PKA-C <sup>WT</sup>                                                             | 0.16 ± 0.02         | -9.33 ± 0.07  | -13.9 ± 0.5   | 4.6 ± 0.4       | 106 ± 18 |
| PKA-C <sup>DNAJB1</sup>                                                         | 1.1 ± 0.2           | -8.2 ± 0.1    | -22 ± 1       | 14 ± 1          | 8 ± 2    |

**Supplementary Table 3:** Kinetic parameters of Kemptide, CREB, and KSR1 phosphorylation for PKA-C<sup>WT</sup> and PKA-C<sup>DNAJB1</sup>. Values for  $K_M$  and  $k_{cat}$  were obtained from a non-linear least-squares analysis of the concentration-dependent initial phosphorylation rates using a standard coupled enzyme activity assay (related to **Fig. 2b** and **Supplementary Fig. 3**). Error in  $k_{cat}/K_M$  was propagated from the error in  $K_M$  and  $k_{cat}$ .

| Kemptide                      |                     |                         |
|-------------------------------|---------------------|-------------------------|
|                               | PKA-C <sup>WT</sup> | PKA-C <sup>DNAJB1</sup> |
| $V_{max}$ ( $\mu\text{M/s}$ ) | $0.25 \pm 0.01$     | $0.33 \pm 0.01$         |
| $K_M$ ( $\mu\text{M}$ )       | $42 \pm 5$          | $44 \pm 6$              |
| $k_{cat}$ ( $\text{s}^{-1}$ ) | $11.4 \pm 0.5$      | $15 \pm 0.5$            |
| $k_{cat}/K_M$                 | $0.27 \pm 0.03$     | $0.34 \pm 0.05$         |

| CREB                          |                     |                         |
|-------------------------------|---------------------|-------------------------|
|                               | PKA-C <sup>WT</sup> | PKA-C <sup>DNAJB1</sup> |
| $V_{max}$ ( $\mu\text{M/s}$ ) | $0.21 \pm 0.01$     | $0.27 \pm 0.02$         |
| $K_M$ ( $\mu\text{M}$ )       | $45 \pm 8$          | $56 \pm 10$             |
| $k_{cat}$ ( $\text{s}^{-1}$ ) | $9.5 \pm 0.5$       | $12.3 \pm 0.9$          |
| $k_{cat}/K_M$                 | $0.21 \pm 0.04$     | $0.22 \pm 0.04$         |

| KSR1                          |                     |                         |
|-------------------------------|---------------------|-------------------------|
|                               | PKA-C <sup>WT</sup> | PKA-C <sup>DNAJB1</sup> |
| $V_{max}$ ( $\mu\text{M/s}$ ) | $0.31 \pm 0.01$     | $0.35 \pm 0.02$         |
| $K_M$ ( $\mu\text{M}$ )       | $30 \pm 5$          | $29 \pm 5$              |
| $k_{cat}$ ( $\text{s}^{-1}$ ) | $14.1 \pm 0.5$      | $15.9 \pm 0.9$          |
| $k_{cat}/K_M$                 | $0.47 \pm 0.08$     | $0.6 \pm 0.1$           |

**Supplementary Table 4:** CONCISE analysis of PKA-C<sup>WT</sup> and PKA-C<sup>DNAJB1</sup>. Value of % closed was calculated as a function of average PC scores. See the Methods section for calculation of  $\Delta\Delta G$  based on CONCISE analysis.

|                                                                   | Average PC Score | % Closed | $\Delta\Delta G$ (kcal/mol) |
|-------------------------------------------------------------------|------------------|----------|-----------------------------|
| PKA-C <sup>WT</sup><br>Apo                                        | -1.02            | 0%       | 0                           |
| PKA-C <sup>DNAJB1</sup><br>Apo                                    | -1.02            | 0%       | 0                           |
| PKA-C <sup>WT</sup><br>ATP <sub>γ</sub> N                         | -0.03            | 46%      | -6.9                        |
| PKA-C <sup>DNAJB1</sup><br>ATP <sub>γ</sub> N                     | 0.03             | 49%      | -7.4                        |
| PKA-C <sup>WT</sup><br>ADP                                        | -0.06            | 45%      | N/A                         |
| PKA-C <sup>DNAJB1</sup><br>ADP                                    | -0.02            | 47%      | N/A                         |
| PKA-C <sup>WT</sup><br>ATP <sub>γ</sub> N/PKI <sub>5-24</sub>     | 1.11             | 100%     | -15.0                       |
| PKA-C <sup>DNAJB1</sup><br>ATP <sub>γ</sub> N/PKI <sub>5-24</sub> | 1.01             | 95%      | -14.3                       |

## Supplementary References

- 1 Walker, C. *et al.* Cushing's syndrome driver mutation disrupts protein kinase A allosteric network, altering both regulation and substrate specificity. *Science Advances* **5**, eaaw9298, doi:10.1126/sciadv.aaw9298 (2019).
