# Supplementary material for: Defective internal allosteric network imparts dysfunctional ATP/substrate-binding cooperativity in oncogenic chimera of protein kinase A
Source: PubMed Central journal article supplement (PMC7946884; doi:10.1038/s42003-021-01819-6), 2021-03-10
Supplement: 42003_2021_1819_MOESM3_ESM.pdf [file 42003_2021_1819_MOESM3_ESM.pdf]

## Description of Additional Supplementary Files

**File name:** Supplementary Data 1

**Description:** Source data underlying plots shown in figures.
